# Supplementary material for: pH-Sensitive nanotheranostics for dual-modality imaging guided nanoenzyme catalysis therapy and phototherapy
Source: Royal Society of Chemistry journal article supplement (doi:10.1039/c9tb02731a), 2020-01-01
Supplement: c9tb02731a1.pdf [file c9tb02731a1.pdf]

## Supporting Information

### **pH-Sensitive Nanotheranostics for Dual-modality Imaging Guided Nanoenzyme Catalysis Therapy and Phototherapy**

Sheng Wang <sup>a1</sup>, Jiaji Mao <sup>b1</sup>, Hong Liu <sup>a</sup>, Shihui Huang <sup>a</sup>, Jiali Cai <sup>a</sup>, Wentao Gui <sup>a</sup>, Jun Wu <sup>c</sup>, Junyao Xu <sup>d</sup>, Jun Shen <sup>b\*</sup>, Zhiyong Wang <sup>a\*</sup>

<sup>a</sup> Center for Functional Biomaterials, Key Laboratory for Polymeric Composite and Functional Materials of Ministry of Education, School of Materials Science and Engineering, Sun Yat-Sen University, Guangzhou 510275, PR China

<sup>b</sup> Department of Radiology, Sun Yat-Sen Memorial Hospital, Sun Yat-Sen University, 107 Yanjiang Road West, Guangzhou, Guangdong, China 510120.

<sup>c</sup> School of medical imaging, North Sichuan Medical College, Nanchong, 637000, China

<sup>d</sup> Department of Hepatobiliary Surgery, Sun Yat-Sen Memorial Hospital, Sun Yat-Sen University, Guangzhou, China

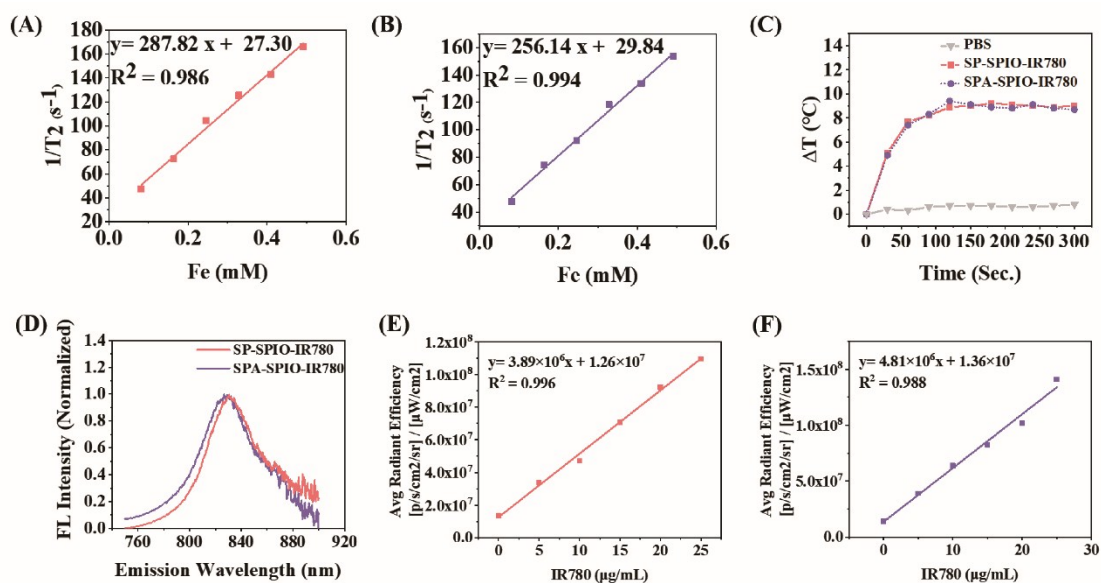

**Figure S1.**  $T_2$  relaxation rates ( $1/T_2$ ,  $s^{-1}$ ) of (A) SP-SPIO-IR780 and (B) SPA-SPIO-IR780. (C) Temperature rises of PBS, SP-SPIO-IR780 or SPA-SPIO-IR780 nanosystem (IR780, 8.00  $\mu g/mL$ ) under the 808 nm laser irradiation at the power density of  $1 W \cdot cm^{-2}$ . (D) Fluorescence spectrum of SP-SPIO-IR780 and SPA-SPIO-IR780. Average radiant efficiency of (E) SP-SPIO-IR780 and (F) SPA-SPIO-IR780.

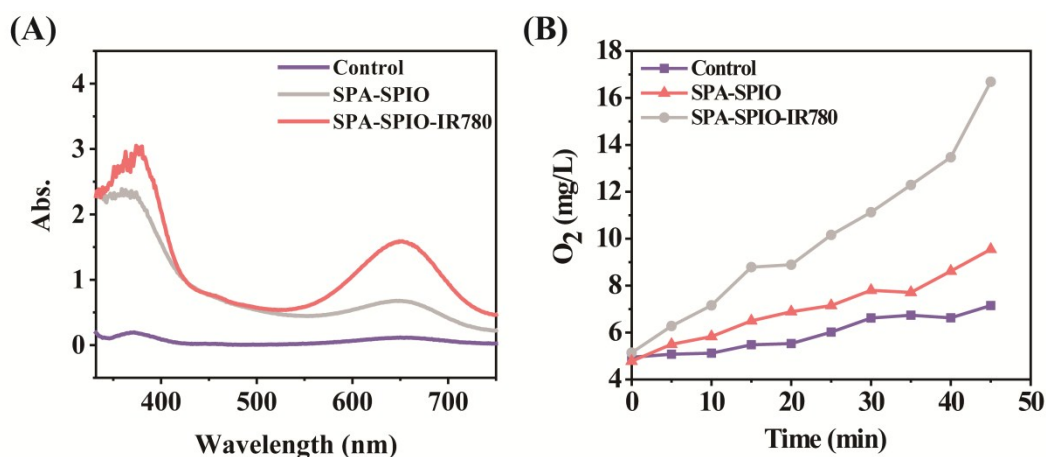

**Figure S2.** (A) Hydroxyl radicals ( $\cdot OH$ ) generation detected by TMB. The absorbance peaks around 370 and 650 nm indicated the relative concentration of hydroxyl radicals ( $\cdot OH$ ). (B) Dissolved oxygen concentration in solution after incubated with different micelles.

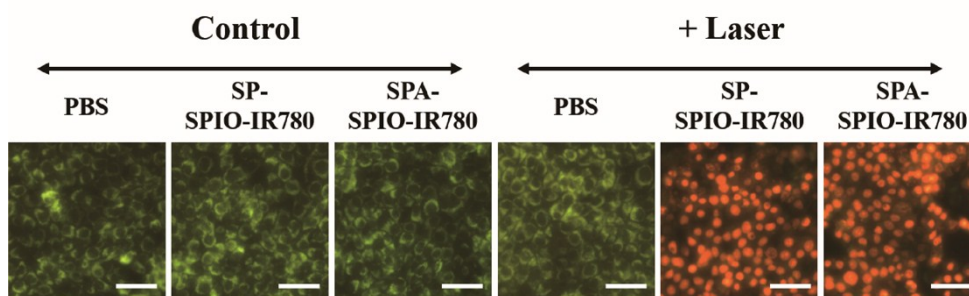

**Figure S3.** Inverted fluorescence microscope images of 4T1 cells incubated with PBS, SP-SPIO-IR780 and SPA-SPIO-IR780 nanosystem with and without 808 nm laser irradiation. The dead cells were dyed to orange with PI assay and the live cells were dyed to green with Calcein-AM. The concentration of SP-SPIO-IR780 or SPA-SPIO-IR780 nanosystem is 2.50  $\mu\text{g}/\text{mL}$  of IR780 (scale bar = 50  $\mu\text{m}$ ).

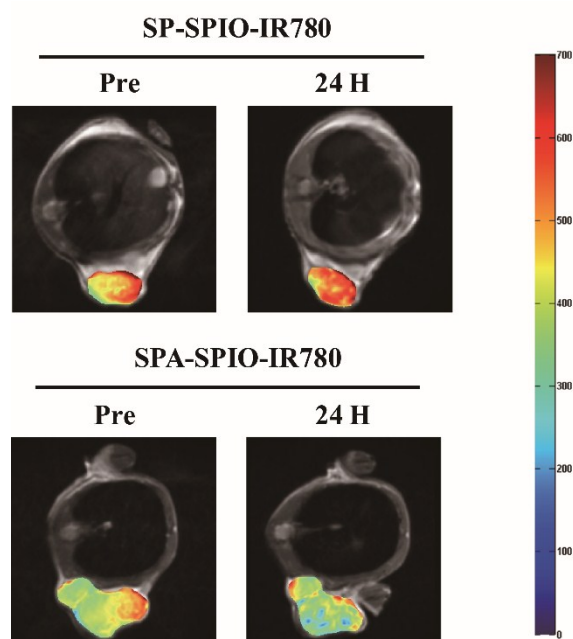

**Figure S4.** MRI (color mapping) of tumor site before and 24 hours post injection.

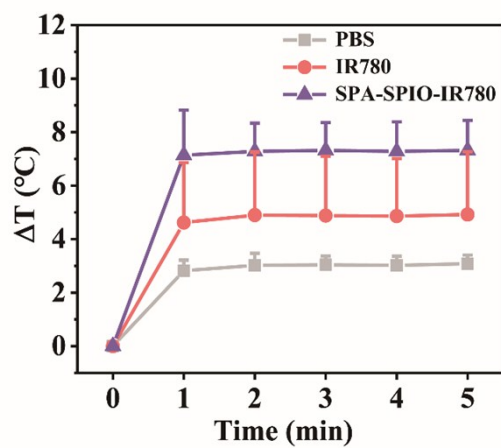

**Figure S5.** Temperature rises of the tumor sites of PBS, IR780 and SPA-SPIO-IR780 nanosystem treated mice respectively after laser irradiation.
